# Supplementary material for: Poor pregnancy outcome in women with type 1 diabetes is predicted by elevated HbA1c and spikes of high glucose values in the third trimester
Source: PubMed Central journal article supplement — J Matern Fetal Neonatal Med. 2013 Jun 20;27(2):149–54. doi: 10.3109/14767058.2013.806896 (PMC3877859; doi:10.3109/14767058.2013.806896), 2013-06-20
Supplement: JMF-27-149-s1.pdf [file JMF-27-149-s1.pdf]

**Supplemental Fig. 1** – Patient analysis sets for poor outcome in early and late pregnancy. GW, gestational week.

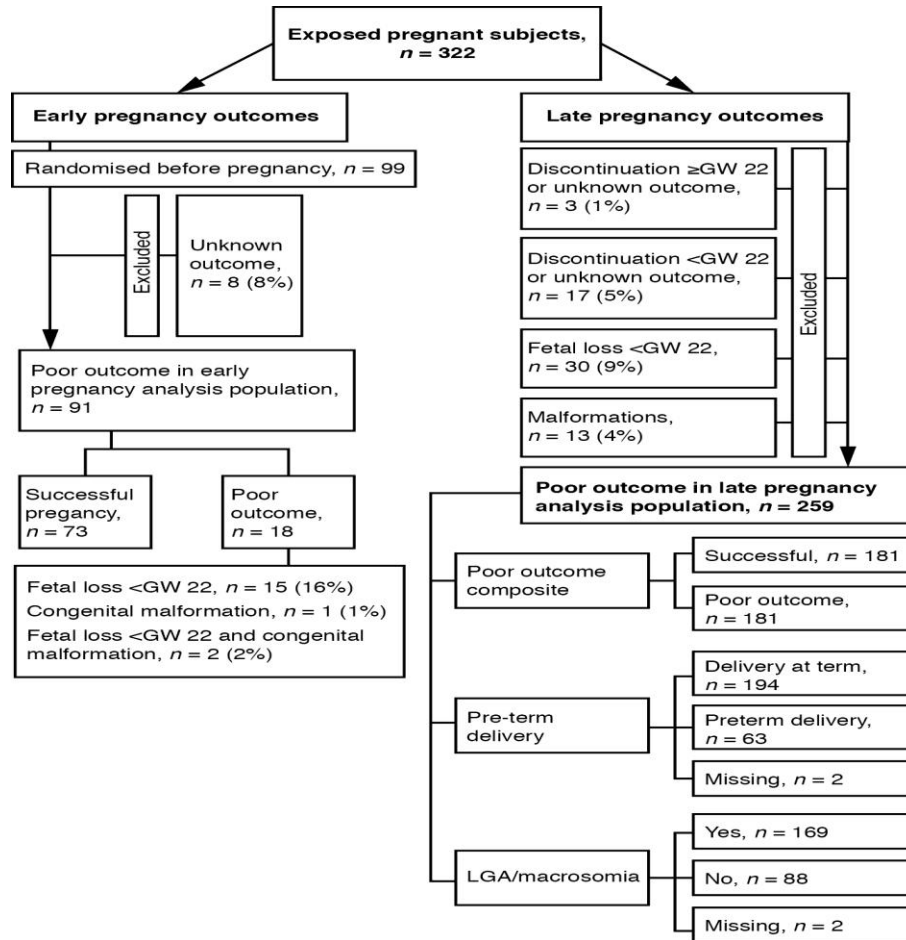

**Supplemental Fig. 2** – HbA<sub>1c</sub> values during pregnancy for subjects with a successful or poor outcome, respectively, in late pregnancy in terms of A) the composite endpoint, B) preterm delivery and C) LGA/macrosomia. Figures include observations available at the specific trimester visit (i.e. for preterm delivery, third-trimester data only include subjects not yet having had a preterm delivery).

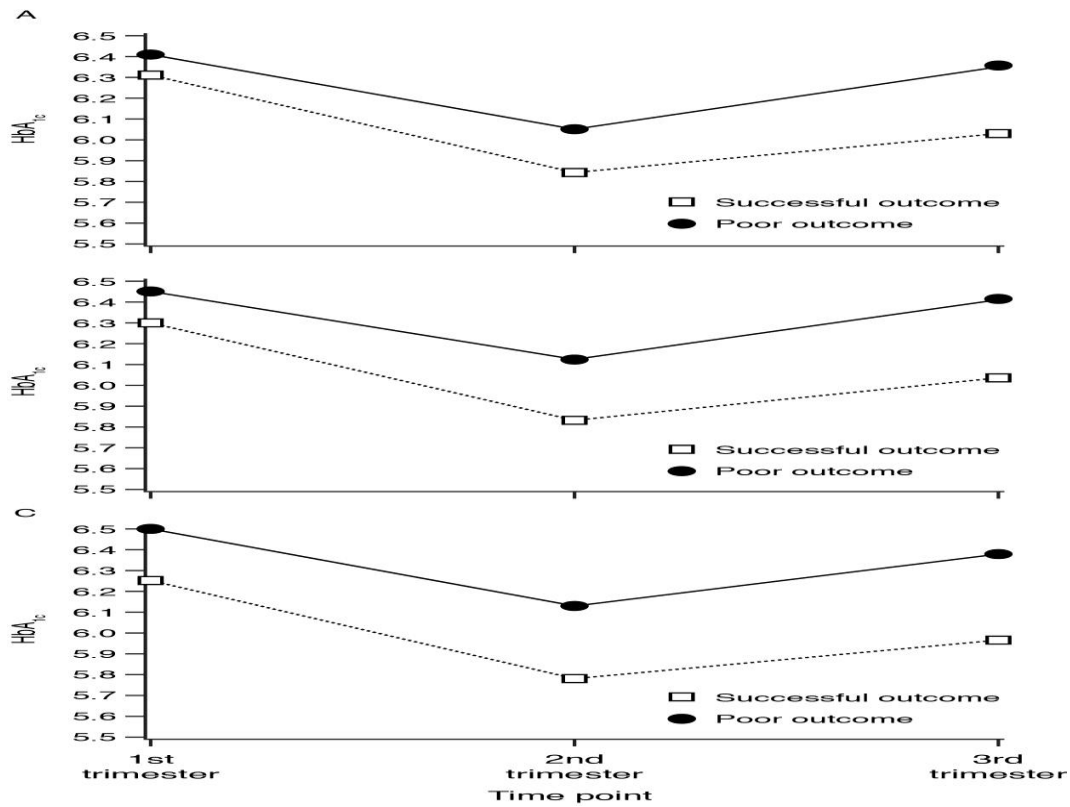

**Supplemental Table 1** – Predictors of poor outcome in early pregnancy in women included prior to pregnancy

| Predictor (baseline)                     |     | Successful outcome (n = 73) | Poor outcome (n = 18) | Odds ratio (CI)     | P-value |
|------------------------------------------|-----|-----------------------------|-----------------------|---------------------|---------|
| HbA <sub>1c</sub> >6.0%<br>[42 mmol/mol] | Yes | 58 (79%)                    | 16 (89%)              | 2.07<br>(0.43,10.0) | 0.56    |
| Major hypoglycaemia<br>in 1st trimester  | Yes | 12 (16%)                    | 0 (0%)                | 0.13<br>(0.01,2.35) | 0.15    |
| PG >11 mmol/L<br>[198 mg/dL]             | Yes | 41 (56%)                    | 8 (44%)               | 0.62<br>(0.22,1.76) | 0.53    |

|                                     |     |          |        |                     |      |
|-------------------------------------|-----|----------|--------|---------------------|------|
| Presence of albuminuria at baseline | Yes | 4 (6%)   | 0 (0%) | 0.51<br>(0.03,10.0) | 0.82 |
| Presence of retinopathy at baseline | Yes | 10 (14%) | 1 (6%) | 0.37<br>(0.04,3.10) | 0.59 |

---

Odds ratio (CI): odds ratio and 95% confidence interval (CI) derived using corrections for continuity. *P*-value continuity corrected Chi-square. Poor outcome in early pregnancy was defined as fetal loss before 22 weeks and/or congenital malformation.

---
